# Supplementary material for: Factors that influence the degradation of 1-ethyl-3-methylimidazolium hexafluorophosphate by Fenton oxidation
Source: Royal Society of Chemistry journal article supplement (doi:10.1039/c6ra12675h), 2016-01-01
Supplement: c6ra12675h1.pdf [file c6ra12675h1.pdf]

Factors that influence degradation of 1-ethyl-3-methylimidazolium  
hexafluorophosphate by Fenton oxidation

Huan Cheng<sup>a</sup>, Guangshi Chen<sup>a</sup>, Yuping Qiu<sup>a,b,\*</sup>, Ben Li<sup>b</sup>, Michael K. Stenstrom<sup>b</sup>

<sup>a</sup> State Key Laboratory of Pollution Control and Resources Reuse, College of Environmental Science and Engineering, Tongji University, Shanghai 200092, P.R. China; <sup>b</sup> Civil and Environmental Engineering Department, University of California, 5732 Boelter Hall, Los Angeles 90095-1593, USA

**Supplementary Data**

Number of pages: 6

Number of figures: 2

Number of tables: 1

**Fig. 1S.** The  $\ln k$  vs.  $1/T$  in Arrhenius expression. ( $[\text{Fe (II)}] = 2 \text{ mmol/L}$ ,  $[\text{H}_2\text{O}_2] = 20 \text{ mmol/L}$ ,  $[\text{IL}]_0 = 2 \text{ mmol/L}$ ,  $\text{pH} = 3$ )

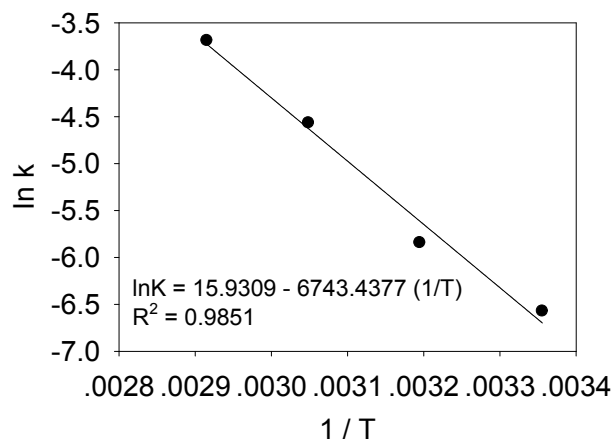

**Fig. 2S.** The degradation intermediates of [C<sub>2</sub>mim][PF<sub>6</sub>] at 120 min in the Fenton system and their structures identified by GC-MS.

a : N-methylformamide      retention time: 5.610

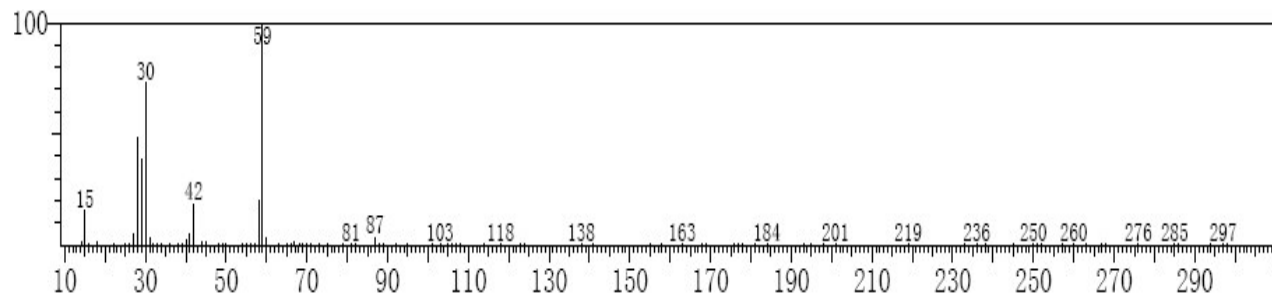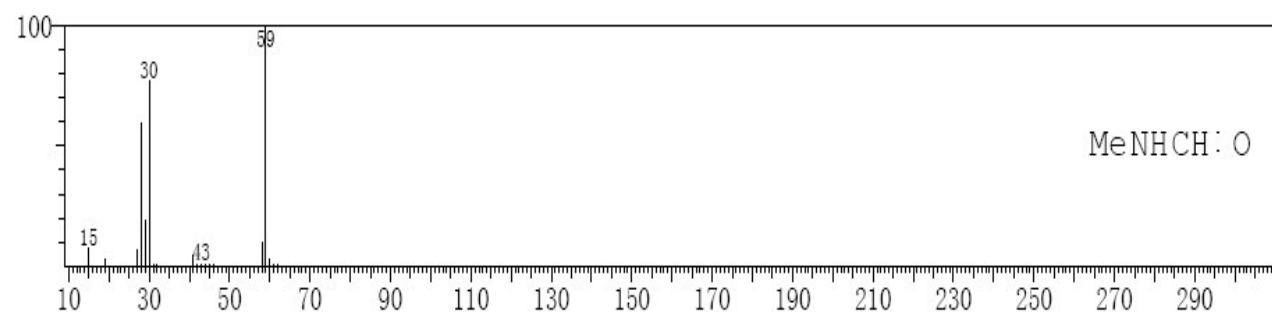

b: N-ethylformamide      retention time: 6.525

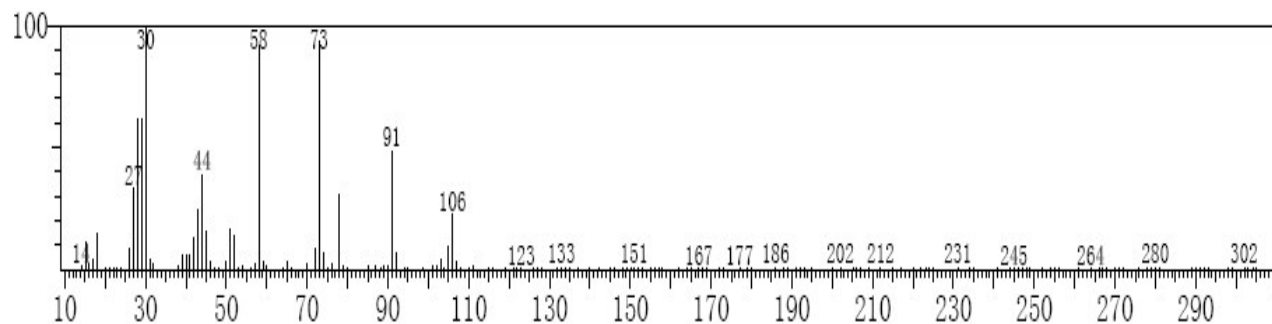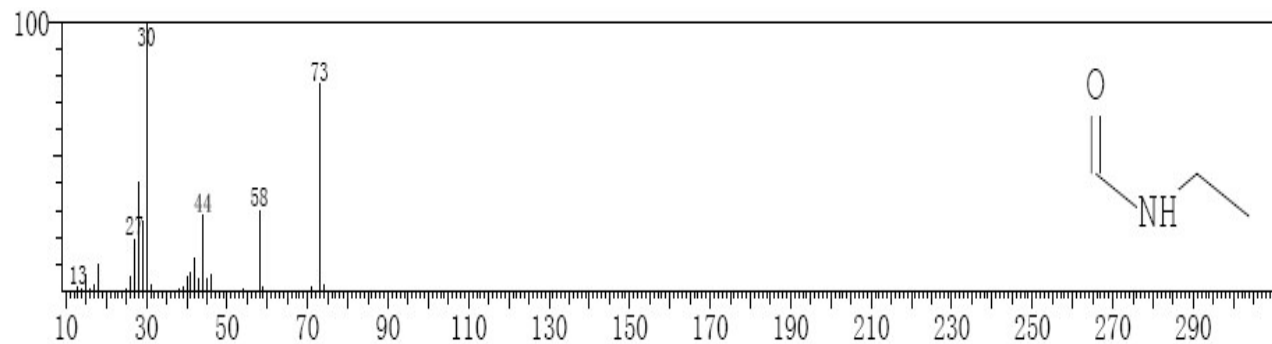

c: Diethylamine retention time: 12.475

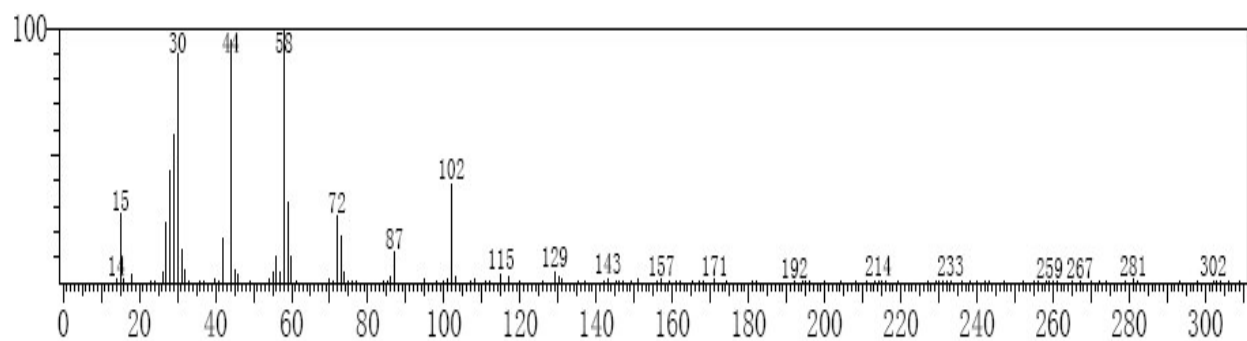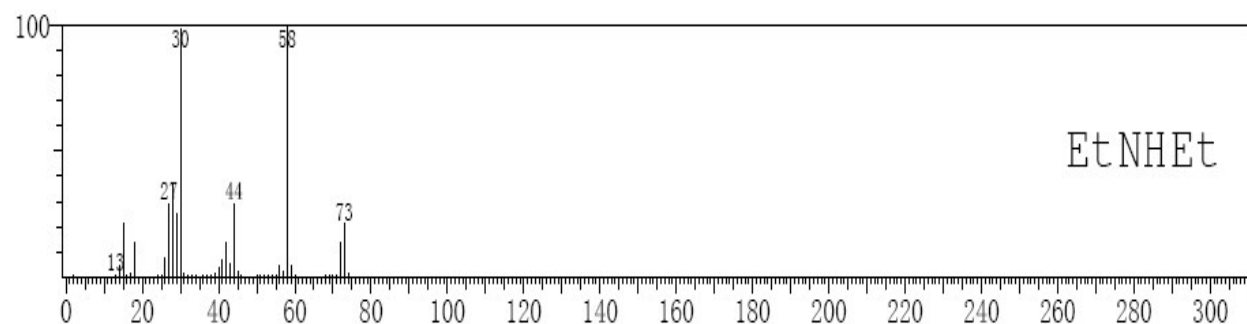

d: 1-ethyl-3-methyl-2,4,5-trioximidazolidine retention time: 12.815

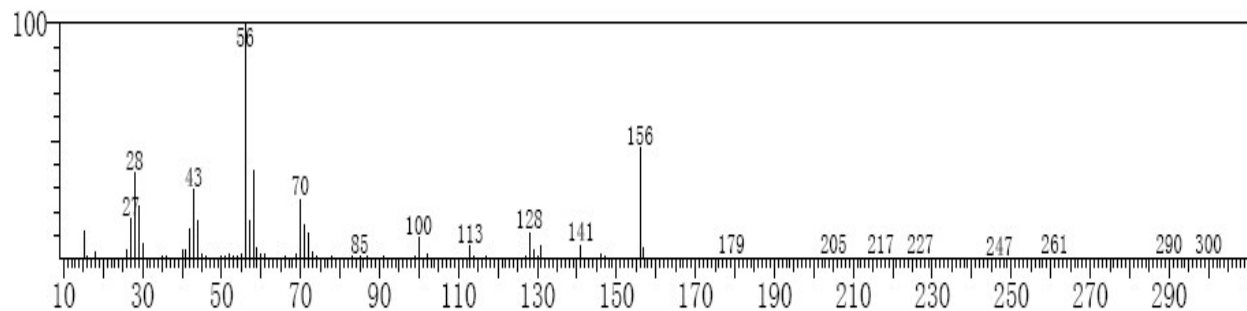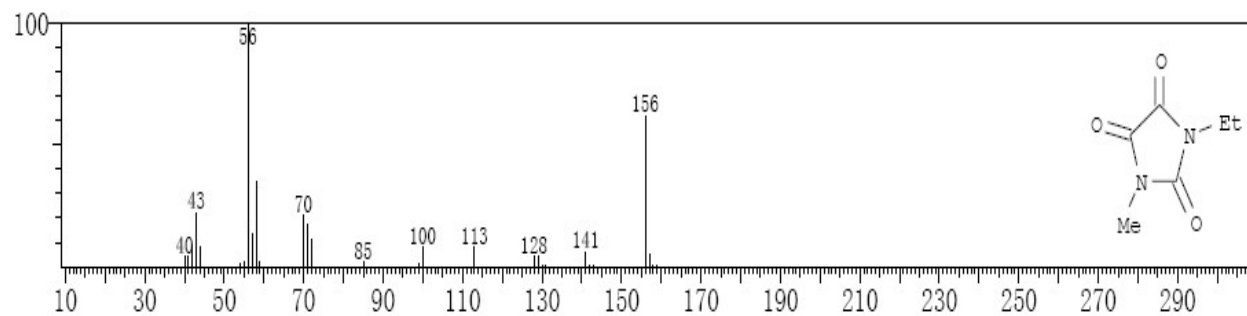

**Table 1S.** The optimum molar ratio for different types of target substrates

| Target substrates                      | Concentration        | Optimum [H <sub>2</sub> O <sub>2</sub> ] / [Fe(II)] | Reference |
|----------------------------------------|----------------------|-----------------------------------------------------|-----------|
| Formic acid                            | 100 nM               | 1                                                   | (a)       |
| Municipal landfill leachate            | COD = 2320-2480 mg/L | 3                                                   | (b)       |
| Humic acid                             | 1000 mg/L            | 4                                                   | (c)       |
| [C <sub>2</sub> mim][PF <sub>6</sub> ] | 2 mM                 | 4                                                   | *         |
| Steroid estrogens                      | 200 mg/L             | 6                                                   | (d)       |
| Reactive Blue 19                       | 100 mg/L             | 10~20                                               | (e)       |
| 4-chlorophenol                         | 40 mg/L              | 20                                                  | (f)       |
| C. I. Acid                             | 40 mg/L              | 59                                                  | (g)       |
| Direct Blue 71                         | 100 mg/L             | 68.6                                                | (h)       |
| p-nitroaniline                         | 0.181 mM             | 200                                                 | (i)       |
| Carpet dyeing wastewater               | TOC = 2000 mg/L      | 156~470                                             | (j)       |

\*the present study

## References

- (a) C. Duesterberg and T. Davidwaite, *Environ. Sci. Technol.*, 2006, **40**, 4189-4195.
- (b) S. Mohajeri, H. A. Aziz, M. H. Isa, M. J. Bashir, L. Mohajeri and M. N. Adlan, *Journal of Environmental Science and Health Part A*, 2010, **45**, 692-698.
- (c) Y. Wu, S. Zhou, F. Qin, K. Zheng and X. Ye, *Journal of hazardous materials*, 2010, **179**, 533-539.

- (d) Y. Li and A. Zhang, *Chemosphere*, 2014, **105**, 24-30.
- (e) F. Emami, A. R. Tehrani-Bagha, K. Gharanjig and F. M. Menger, *Desalination*, 2010, **257**, 124-128.
- (f) S. Nie, Z. Wu, S. Yao, X. Liu, H. Song, Z. Fang, X. Wang and S. Wu, *Asian Journal of Chemistry*, 2014, **26**.
- (g) M.A.Behnajady, N.Modirshahla and F.Ghanbary, *Journal of hazardous materials*, 2007, **148**, 98-102.
- (h) N. Ertugay and F. N. Acar, *Arabian Journal of Chemistry*, 2013, DOI: 10.1016/j.arabjc.2013.02.009.
- (i) J. H. Sun, S. P. Sun, M. H. Fan, H. Q. Guo, L. P. Qiao and R. X. Sun, *Journal of hazardous materials*, 2007, **148**, 172-177.
- (j) I. Gulkaya, G. A. Surucu and F. B. Dilek, *Journal of hazardous materials*, 2006, **136**, 763-769.
